# Supplementary material for: Protocol for single-molecule FISH in the developing mouse retinal vasculature
Source: PubMed Central journal article supplement (PMC11699415; doi:10.1016/j.xpro.2024.103510), 2024-12-12
Supplement: mmc1.pdf [file mmc1.pdf]

1 **Supplemental information**

2

3 **Table S1:** Oligonucleotide sequences of smFISH Stellaris® probe targeting *Pecam1*, related  
4 to Step 6.

| Oligonucleotide  | Sequence (5'-3')     | Oligonucleotide  | Sequence (5'-3')      |
|------------------|----------------------|------------------|-----------------------|
| <i>Pecam1_1</i>  | agacttctgcagactgaagc | <i>Pecam1_25</i> | gcttatctgtgaatgttgct  |
| <i>Pecam1_2</i>  | tccatatggatgctgtgat  | <i>Pecam1_26</i> | gggtgggaatggcaattatc  |
| <i>Pecam1_3</i>  | tcgcatcgtccttatagaac | <i>Pecam1_27</i> | atcacaactcatccactgg   |
| <i>Pecam1_4</i>  | ctgaggaatgacgtagctct | <i>Pecam1_28</i> | ttcacagagcaccgaagta   |
| <i>Pecam1_5</i>  | catcactgtgcatttgact  | <i>Pecam1_29</i> | ttgtgtgccaacgctt      |
| <i>Pecam1_6</i>  | tcaatcgtggttttctt    | <i>Pecam1_30</i> | gaggctgtacagtagtactg  |
| <i>Pecam1_7</i>  | ggaacaattgaccgtcacga | <i>Pecam1_31</i> | ggcaaggaagactctgactg  |
| <i>Pecam1_8</i>  | tcgcttgacaaacttgctc  | <i>Pecam1_32</i> | atgacaaccaccgcaatgag  |
| <i>Pecam1_9</i>  | cggtggaggtcttatctatc | <i>Pecam1_33</i> | gcattggctgcaactatta   |
| <i>Pecam1_10</i> | aatggggaattccatgagca | <i>Pecam1_34</i> | ttggagttcagaagtggagc  |
| <i>Pecam1_11</i> | aacactaacacgtggtcctg | <i>Pecam1_35</i> | ccacactaggctcagaaatc  |
| <i>Pecam1_12</i> | gcaatttgaatccggacagg | <i>Pecam1_36</i> | gttttactgcatcttcca    |
| <i>Pecam1_13</i> | cagggggcttgattcaaac  | <i>Pecam1_37</i> | ttcacttctgtgtattcta   |
| <i>Pecam1_14</i> | tgctactgaaactgcacc   | <i>Pecam1_38</i> | aatacgtgcacaggactctc  |
| <i>Pecam1_15</i> | ctgtaaactcctggaccaag | <i>Pecam1_39</i> | gaaggattactgcttcggt   |
| <i>Pecam1_16</i> | tacaatgccttgtctttt   | <i>Pecam1_40</i> | aggcagcggggtttaaatt   |
| <i>Pecam1_17</i> | actgagtagacagcttact  | <i>Pecam1_41</i> | tctctgtataccaacatga   |
| <i>Pecam1_18</i> | gatacggtttgattccactt | <i>Pecam1_42</i> | atattccagggcattattct  |
| <i>Pecam1_19</i> | gttatgttgaccatgatgct | <i>Pecam1_43</i> | agacacaacatttcagcctc  |
| <i>Pecam1_20</i> | gaactctaactcggcttg   | <i>Pecam1_44</i> | cacggagaagtactctgtct  |
| <i>Pecam1_21</i> | cggcgatcttgcgtgaaatc | <i>Pecam1_45</i> | tgaggctctgtctcaagtga  |
| <i>Pecam1_22</i> | aaatactgggcttcgagagc | <i>Pecam1_46</i> | aaggaagatcaagggtgcgct |
| <i>Pecam1_23</i> | atctcagacttggcatcatg | <i>Pecam1_47</i> | cagaccttaggaaaccgttt  |
| <i>Pecam1_24</i> | agagtctggaagtcaacttt | <i>Pecam1_48</i> | acacaaaatgtcggcagctc  |

5

6

7

8
